# Supplementary material
Source: publisher figshare collection journal article supplement (https://frontiersin.figshare.com/ndownloader/files/23845262)
Supplement: Supplementary file [file 23845262]

**Figure S1:** Rarefaction curve of all samples. Dashed line represents the sub-sampling depth.

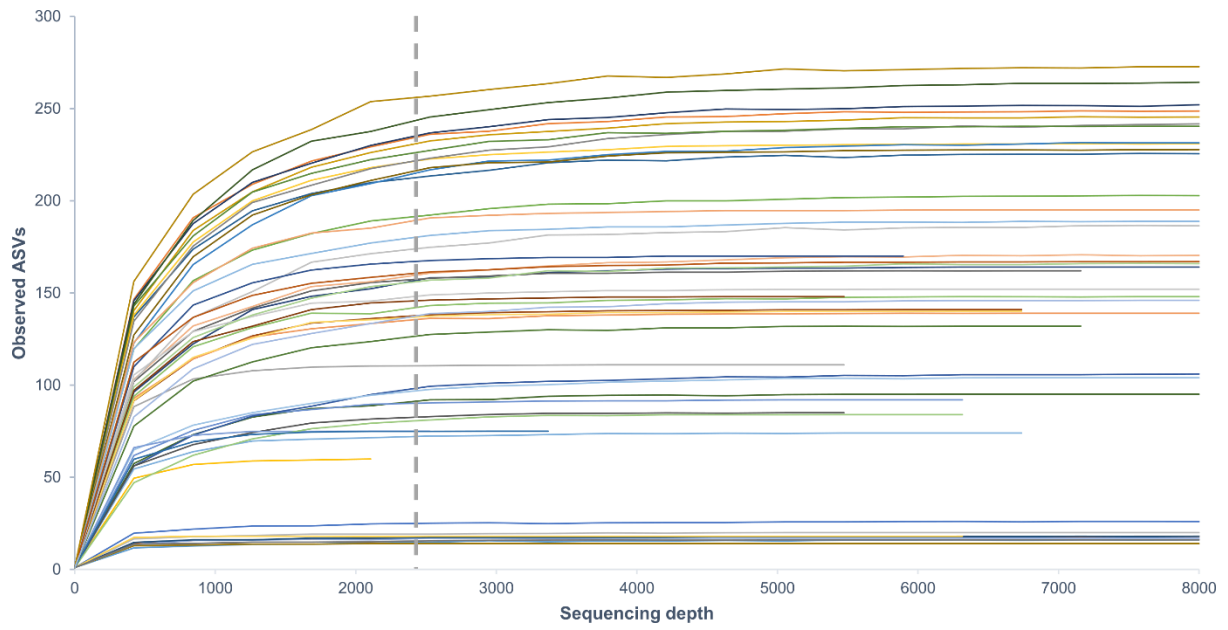

**Figure S2:** Taxonomic composition of all samples at the phylum level (A) and order level (B).

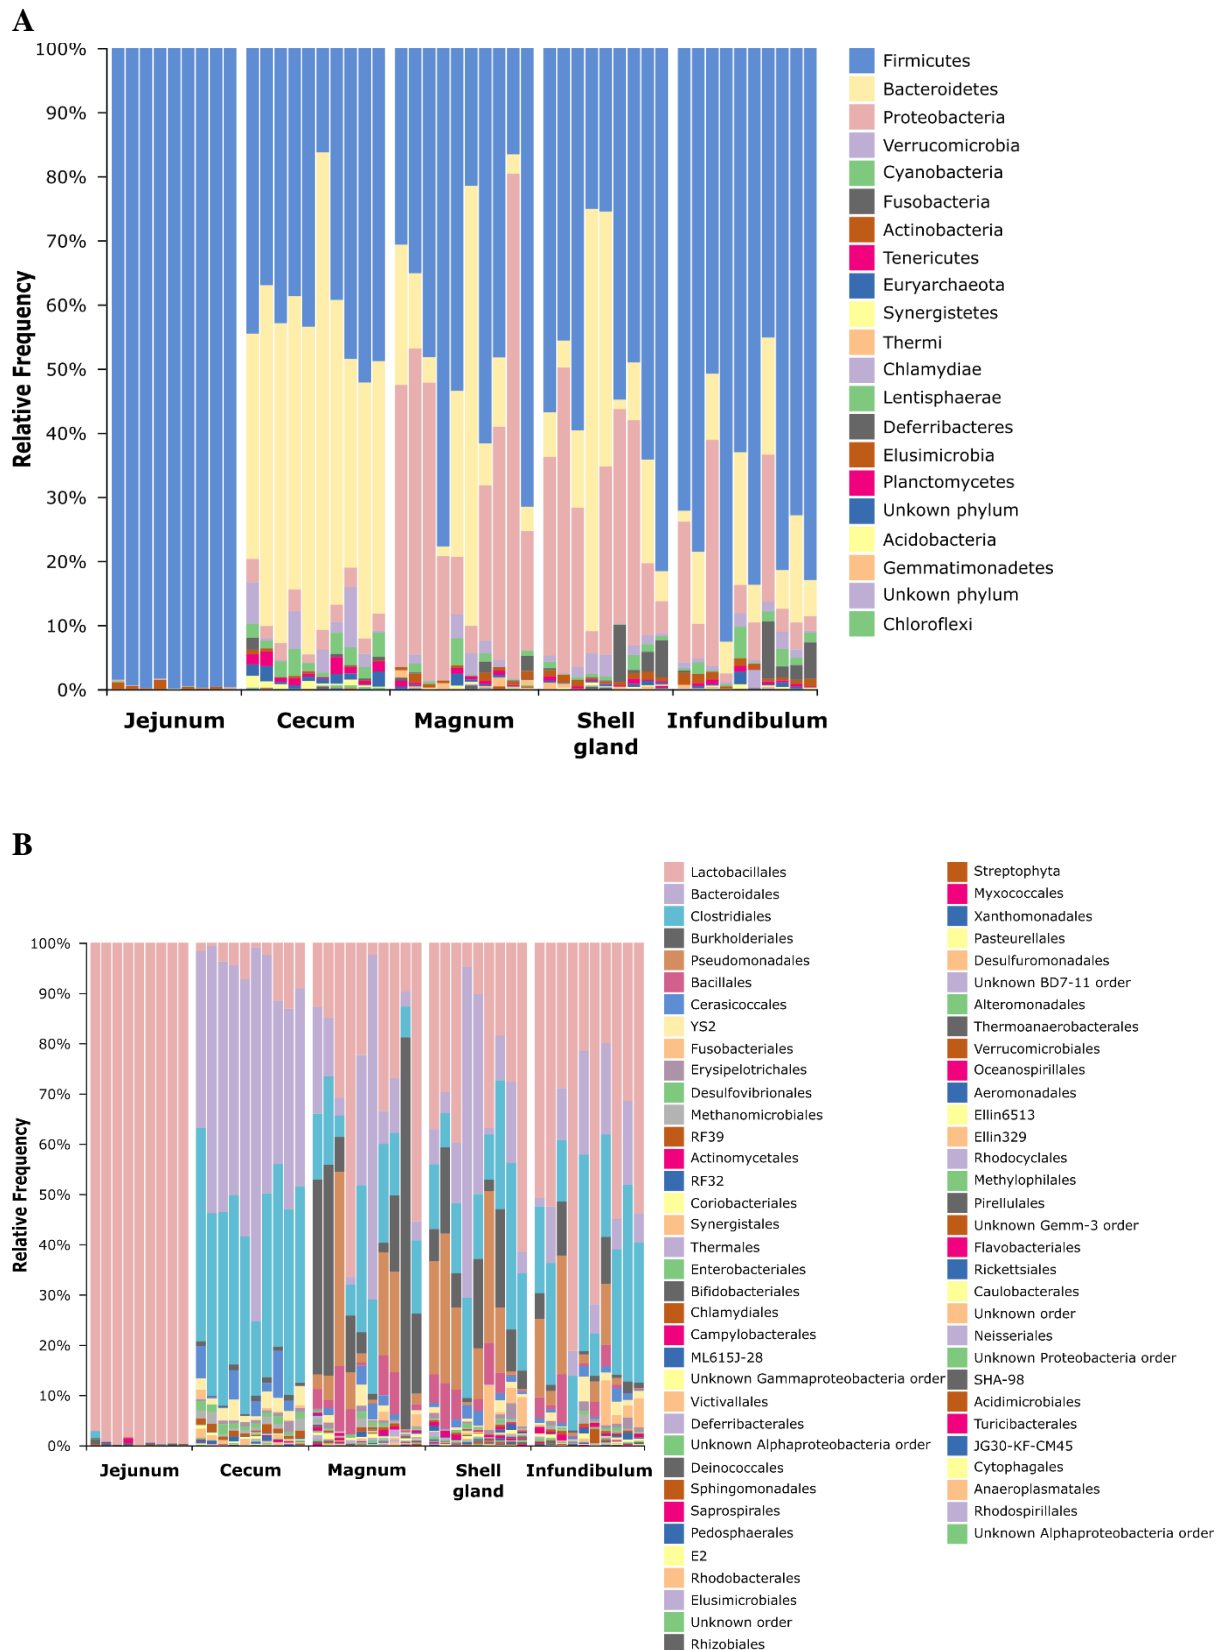

**Figure S3:** PCoA analysis of all oviduct samples based on Bray-Curtis (A) and Jaccard (B) metrics.

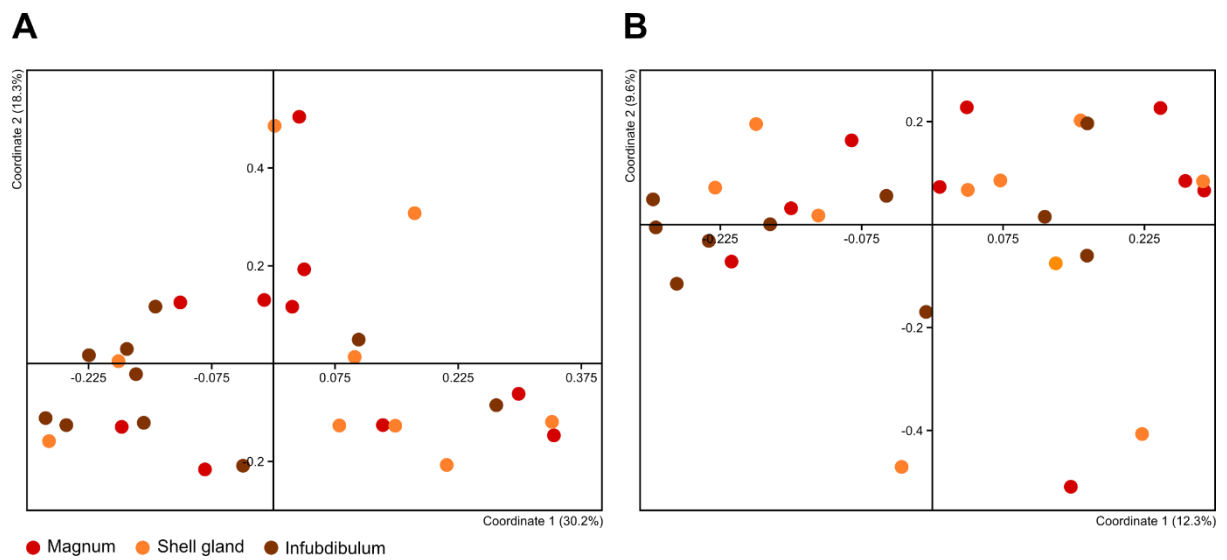

**Figure S4:** ASVs shared between the different sites. Individual- and pan-based analyses. The number of shared ASVs in each intersection is noted in the table, as well the percentage of the total number of ASVs in parentheses.

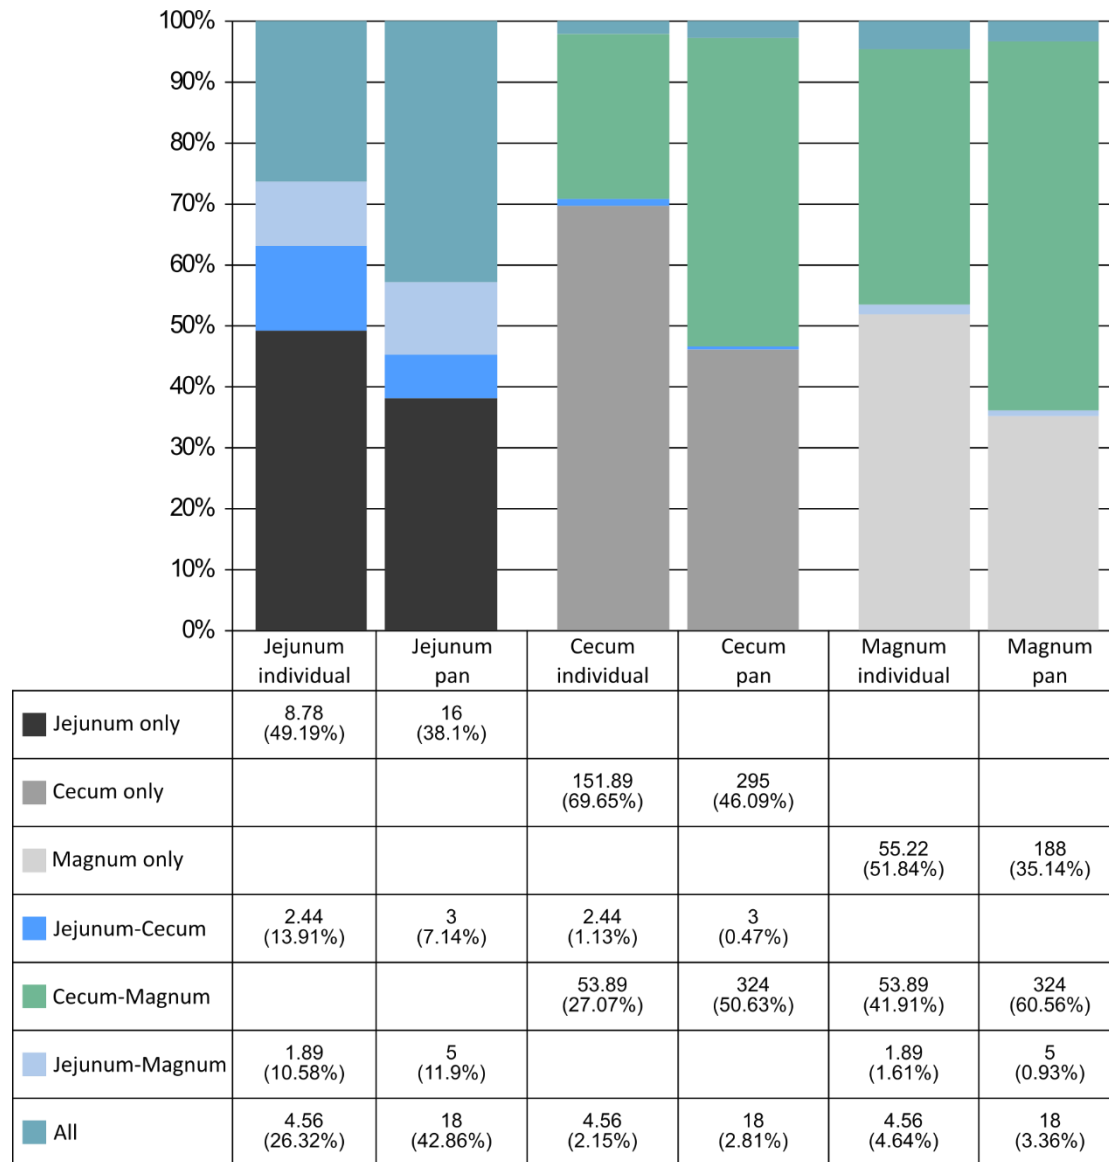

**Figure S5:** The total relative abundance of ASVs in each intersection, in each of the sites, based on an individual analysis.

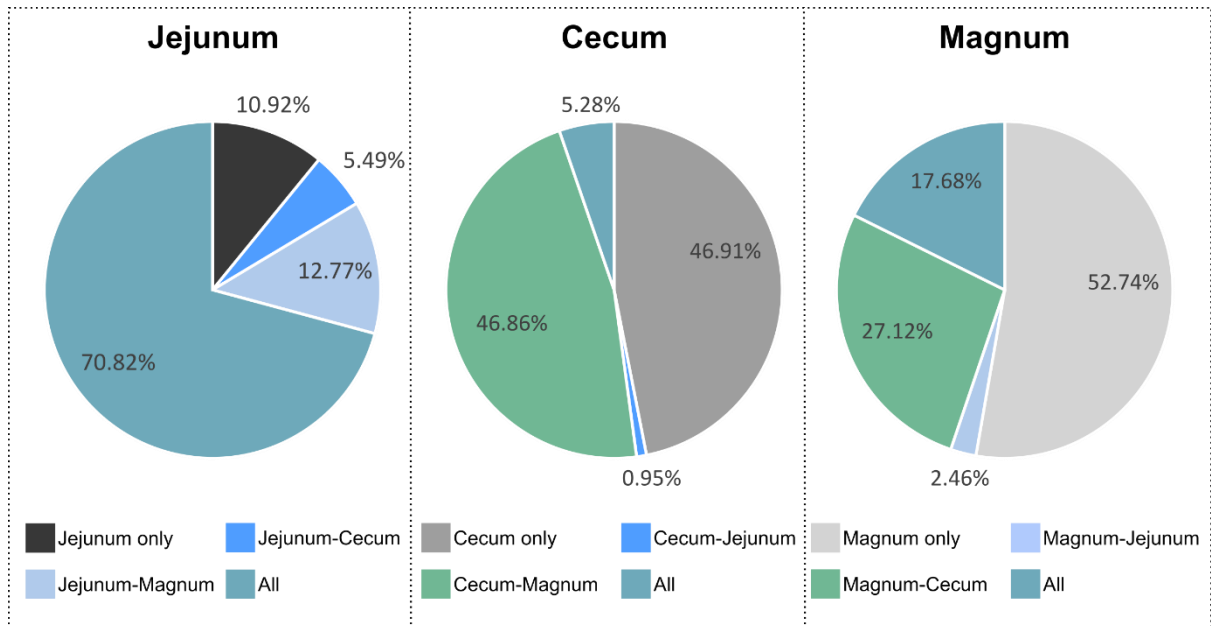

**Table S1:** ANOSIM Bonferroni-corrected  $p$ -values, based on Bray-Curtis metric. Significant  $p$ -values are highlighted.

|              | Jejunum | Cecum | Magnum | Shell gland | Infundibulum |
|--------------|---------|-------|--------|-------------|--------------|
| Jejunum      |         | 0.001 | 0.002  | 0.002       | 0.001        |
| Cecum        | 0.001   |       | 0.001  | 0.002       | 0.001        |
| Magnum       | 0.002   | 0.001 |        | 1           | 0.575        |
| Shell gland  | 0.002   | 0.002 | 1      |             | 0.791        |
| Infundibulum | 0.001   | 0.001 | 0.575  | 0.791       |              |

**Table S2:** ANOSIM Bonferroni-corrected  $p$ -values, based on Jaccard metric. Significant  $p$ -values are highlighted.

|              | Jejunum | Cecum | Magnum | Shell gland | Infundibulum |
|--------------|---------|-------|--------|-------------|--------------|
| Jejunum      |         | 0.001 | 0.001  | 0.001       | 0.001        |
| Cecum        | 0.001   |       | 0.001  | 0.001       | 0.002        |
| Magnum       | 0.001   | 0.001 |        | 1           | 0.786        |
| Shell gland  | 0.001   | 0.001 | 1      |             | 1            |
| Infundibulum | 0.001   | 0.002 | 0.786  | 1           |              |
